# Supplementary material for: Suppression of interferon signaling via small-molecule modulation of TFAM
Source: eLife. 2026 Feb 6;14:RP108742. doi: 10.7554/eLife.108742 (PMC12880803; doi:10.7554/eLife.108742)
Supplement: Figure 1—source data 1. [file elife-108742-fig1-data1.xlsx]

## Sheet: Figure 1D A549
Concentration (µM)	Compound 2					SD
20	2.049	1.495	1.613	1.36		0.298313
6.6	2.122	1.462	0.986	1.216		0.490486
2.22	1.131	1.087	1.417	1.142		0.150389
0.75	1.024	1.426	1.203	1.07		0.180258
0.25	1.352	0.821	1.08	1.201		0.224512
0	0.746	1.107	1.119	1.028		0.174079

## Sheet: Figure 1D 22RV1
Concentration (µM)	Compound 2					SD
25	2.028	1.566	2.23	1.688		0.305422
8.33	1.596	1.387	1.469	1.067		0.225533
2.78	1.046	1.09	1.233	1.078		0.0829392
0.93	1.113	0.893	1.105	0.935		0.113928
0.31	1.142	0.716	0.968	1.084		0.188746
0	0.914	1.006	0.994	1.086		0.0703894

## Sheet: Figure 1D A172
Concentration (µM)	Compound 2					SD
20	1.816	1.822	2.226	1.667		0.239802
6.6	1.073	1.46	1.607	1.188		0.244831
2.22	1.043	1.317	0.89	1.019		0.179545
0.75	0.979	1.074	0.78	0.969		0.123122
0.25	1.109	1.168	1.134	0.921		0.110674
0	1.023	1.033	0.926	1.019		0.0498489

## Sheet: Figure 1D T47D
Concentration (µM)	Compound 2					SD
20	3.228	2.363	3.007	3.028		0.375773
6.6	2.034	2.217	2.499	2.776		0.325194
2.2	1.235	1.834	0.938	1.579		0.392011
0.74	1.305	1.177	1.047	0.893		0.176532
0.25	1.418	1.234	1.495	0.846		0.28966
0	1.217	1.01	1.402	0.846		0.242283
