# Supplementary material for: Suppression of interferon signaling via small-molecule modulation of TFAM
Source: eLife. 2026 Feb 6;14:RP108742. doi: 10.7554/eLife.108742 (PMC12880803; doi:10.7554/eLife.108742)
Supplement: Figure 2—source data 1. [file elife-108742-fig2-data1.xlsx]

## Sheet: Figure 2B VBIT-4
DMSO	3uM	10uM	DMSO	3uM	10uM
3.71848	2.17584	2.21156	21.3415	9.69392	3.54609
3.65865	2.45313	2.27926	20.6317	8.82138	2.38887
4.73259	3.29189	2.2082	15.9871	10.7899	4.48617
Dunnett's multiple comparisons test	Mean Diff.	95.00% CI of diff.	Below threshold?	Summary	Adjusted P Value	D-?
DMSO vs. 3uM	9.552	5.171 to 13.93	Yes	**	0.0014	E	3uM
DMSO vs. 10uM	15.85	11.47 to 20.23	Yes	****	<0.0001	F	10uM

## Sheet: Figure 2B H151
DMSO	0.5uM	1uM	DMSO	0.5uM	1uM
3.71848	3.29593	2.80406	21.3415	11.2226	4.79383
3.65865	3.39416	2.0102	20.6317	9.34101	3.78974
4.73259	3.04055	2.84168	15.9871	15.5775	5.3257
Dunnett's multiple comparisons test	Mean Diff.	95.00% CI of diff.	Below threshold?	Summary	Adjusted P Value	D-?
DMSO vs. 0.5uM	7.273	1.344 to 13.20	Yes	*	0.0223	E	0.5uM
DMSO vs. 1uM	14.68	8.755 to 20.61	Yes	***	0.0007	F	1uM

## Sheet: Figure 2B Compound 1
DMSO	3uM	10uM	DMSO	3uM	10uM
3.71848	3.79608	2.4588	21.3415	13.4824	21.746
3.65865	2.78662	2.64971	20.6317	15.2819	13.3162
4.73259	2.6688	3.28008	15.9871	19.3911	10.004
Dunnett's multiple comparisons test	Mean Diff.	95.00% CI of diff.	Below threshold?	Summary	Adjusted P Value	D-?
DMSO vs. 3uM	3.268	-6.675 to 13.21	No	ns	0.5728	E	3uM
DMSO vs. 10uM	4.298	-5.646 to 14.24	No	ns	0.4116	F	10uM

## Sheet: Figure 2B Compound 2
DMSO	3uM	10uM	DMSO	3uM	10uM
3.71848	2.75698	3.363	21.3415	15.0487	9.21657
3.65865	3.13267	3.44406	20.6317	16.3251	6.24954
4.73259	3.32808	2.72531	15.9871	16.4714	8.45972
Dunnett's multiple comparisons test	Mean Diff.	95.00% CI of diff.	Below threshold?	Summary	Adjusted P Value	D-?
DMSO vs. 3uM	3.372	-1.195 to 7.938	No	ns	0.1336	E	3uM
DMSO vs. 10uM	11.34	6.779 to 15.91	Yes	***	0.0007	F	10uM

## Sheet: Figure 2B Compound 3
DMSO	3uM	10uM	DMSO	3uM	10uM
3.71848	3.05981	2.84383	21.3415	7.02564	3.52833
3.65865	3.15934	3.02475	20.6317	7.78197	2.97329
4.73259	3.17352	2.88686	15.9871	8.43245	3.47164
Dunnett's multiple comparisons test	Mean Diff.	95.00% CI of diff.	Below threshold?	Summary	Adjusted P Value	D-?
DMSO vs. 3uM	11.57	7.514 to 15.63	Yes	***	0.0003	E	3uM
DMSO vs. 10uM	16	11.94 to 20.06	Yes	****	<0.0001	F	10uM

## Sheet: Figure 2B Compound 15
DMSO	3uM	10uM	DMSO	3uM	10uM
3.71848	2.74415	3.9531	21.3415	19.5641	9.32607
3.65865	3.1113	3.39361	20.6317	16.0689	8.65576
4.73259	2.97707	3.45842	15.9871	18.7084	7.47166
Dunnett's multiple comparisons test	Mean Diff.	95.00% CI of diff.	Below threshold?	Summary	Adjusted P Value	D-?
DMSO vs. 3uM	1.206	-3.596 to 6.008	No	ns	0.7087	E	3uM
DMSO vs. 10uM	10.84	6.034 to 15.64	Yes	**	0.0012	F	10uM

## Sheet: Figure 2D VBIT-4
DMSO	3uM	10uM	DMSO	3uM	10uM
1.35827	1.31678	1.20882	4.56602	1.36345	1.02598
0.791831	0.842622	1.00276	3.74563	1.18632	1.11462
0.849898	0.840598	0.788419	3.57271	1.06643
Šídák's multiple comparisons test	Mean Diff.	95.00% CI of diff.	Below threshold?	Summary	Adjusted P Value
DMSO vs. 3uM	3.333e-07	-0.7787 to 0.7787	No	ns	>0.9999	A-B
DMSO vs. 10uM	3.333e-07	-0.7787 to 0.7787	No	ns	>0.9999	A-C
DMSO vs. DMSO	-2.961	-3.740 to -2.183	Yes	****	<0.0001	A-D
DMSO vs. 3uM	2.756	1.977 to 3.535	Yes	****	<0.0001	D-E
DMSO vs. 10uM	2.891	2.021 to 3.762	Yes	****	<0.0001	D-F

## Sheet: Figure 2D H151
DMSO	3uM	10uM	DMSO	3uM	10uM
1.35827	1.31577	0.949117	4.56602	1.2007	0.840703
0.791831	0.846032	1.17085	3.74563	1.10939	0.782111
0.849898	0.8382	0.880036	3.57271	1.16694	1.34902
Šídák's multiple comparisons test	Mean Diff.	95.00% CI of diff.	Below threshold?	Summary	Adjusted P Value
DMSO vs. 3uM	0	-0.7699 to 0.7699	No	ns	>0.9999	A-B
DMSO vs. 10uM	0	-0.7699 to 0.7699	No	ns	>0.9999	A-C
DMSO vs. DMSO	-2.961	-3.731 to -2.192	Yes	****	<0.0001	A-D
DMSO vs. 3uM	2.802	2.033 to 3.572	Yes	****	<0.0001	D-E
DMSO vs. 10uM	2.971	2.201 to 3.741	Yes	****	<0.0001	D-F

## Sheet: Figure 2D Compound 1
DMSO	3uM	10uM	DMSO	3uM	10uM
0.921687	1.13971	0.882703	3.82698	2.44869	2.33634
1.02185	0.968607	1.11786	5.25793	3.48105	3.45173
1.05646	0.891679	0.999442	5.04212	3.85175	4.72285
Šídák's multiple comparisons test	Mean Diff.	95.00% CI of diff.	Below threshold?	Summary	Adjusted P Value
DMSO vs. 3uM	3.333e-07	-1.631 to 1.631	No	ns	>0.9999	A-B
DMSO vs. 10uM	3.333e-07	-1.631 to 1.631	No	ns	>0.9999	A-C
DMSO vs. DMSO	-3.709	-5.340 to -2.078	Yes	****	<0.0001	A-D
DMSO vs. 3uM	1.449	-0.1825 to 3.079	No	ns	0.0924	D-E
DMSO vs. 10uM	1.205	-0.4256 to 2.836	No	ns	0.2017	D-F

## Sheet: Figure 2D Compound 2
DMSO	3uM	10uM	DMSO	3uM	10uM
1.35827	1.55261	0.928017	4.56602	1.3155	1.14675
0.791831	0.77066	1.204	3.74563	1.52669	1.29417
0.849898	0.676734	0.867979	3.57271	1.43266
Šídák's multiple comparisons test	Mean Diff.	95.00% CI of diff.	Below threshold?	Summary	Adjusted P Value
DMSO vs. 3uM	0	-0.8744 to 0.8744	No	ns	>0.9999	A-B
DMSO vs. 10uM	0	-0.8744 to 0.8744	No	ns	>0.9999	A-C
DMSO vs. DMSO	-2.961	-3.836 to -2.087	Yes	****	<0.0001	A-D
DMSO vs. 3uM	2.537	1.662 to 3.411	Yes	****	<0.0001	D-E
DMSO vs. 10uM	2.741	1.763 to 3.719	Yes	****	<0.0001	D-F

[truncated: 6 more sheets: Figure 2D Compound 3, Figure 2D Compound 15, Figure 2-figure supplement 1A, Figure 2-figure supplement 1B, Figure 2-figure supplement 1C, Figure 2-figure supplement 2]
