# Supplementary material for: Suppression of interferon signaling via small-molecule modulation of TFAM
Source: eLife. 2026 Feb 6;14:RP108742. doi: 10.7554/eLife.108742 (PMC12880803; doi:10.7554/eLife.108742)
Supplement: Figure 3—source data 1. [file elife-108742-fig3-data1.xlsx]

## Sheet: Figure 3B
Concentration	Compound 1							SD
40	2.54921	3.5835	4.37432	4.45312	5.6947	7.02932		1.57546
20	2.04492	2.97546	3.593	4.07219	4.93027	6.81895		1.66272
10	2.10049	2.23697	3.16419	3.06111	4.31943	5.75012		1.38356
5	2.20726	2.37963	2.54627	2.87721	3.84213	5.27666		1.17594
2.5	2.96271	2.22762	2.47825	2.6323	3.55967	4.65799		0.896965
1.25	2.28929	2.54167	2.46038	2.55735	2.78295	4.15973		0.685699
0.625	3.74192	2.81402	2.25793	2.06542	2.57914	3.66743		0.707724
0.3125	2.86869	2.82344	2.52606	2.47433	2.28025	3.00826		0.278604
0	2.69594	3.65295	2.83785	2.97342	2.40164	2.2902		0.48744
Concentration	Compound 2
80	1.26876	1.30777	1.32277	1.36683	1.34851	1.40363		0.0472716
48.89	0.946911	0.960335	1.0284	1.02113	0.936804	1.00755		0.0401669
33.33	1.03661	1.21143	1.26955	1.20859	1.25739	1.13531		0.0873142
10	2.22531	2.13402	2.39191	2.14603	2.22625	2.38812		0.113692
5	3.35841	2.93707	3.33393	3.44084	3.82618	3.69479		0.311289
2.5	4.06338	3.84402	3.74895	4.38839	4.22541	3.79475		0.25863
1.25	4.31827	4.14597	4.28384	4.71671	4.7603	4.26442		0.257631
0.625	4.88458	4.45345	4.67312	4.49041	4.54836	3.88208		0.335715
0	4.66918	5.61309	4.54157	4.2401	5.74116	5.06367		0.603893
Concentration	Compound 3
40	5.55159	5.23209	4.75828	4.24961	4.22263	3.64355		0.708454
20	5.38273	4.65896	0.80751	4.16711	4.20879	3.50412		1.5866
10	1.20044	4.24523	4.41548	4.18672	3.70958	3.54318		1.19865
5	5.15397	4.48783	4.27728	3.97583	3.92608	3.63146		0.536054
2.5	5.92188	5.10317	4.45139	4.82589	4.83342	4.2384		0.588948
1.25	5.42337	5.62095	4.53442	4.9683	4.41069	4.56175		0.506647
0.625	5.71168	5.31442	4.55772	4.44018	4.54564	4.46541		0.538778
0.3125	5.41724	4.20839	4.80504	4.16553	5.00683	4.11088		0.539376
0	5.81188	5.5649	5.66369	5.24085	5.49939	4.17218		0.595951
Concentration	Compound 4
40	5.55159	5.23209	4.75828	4.24961	4.22263	3.64355		0.708454
20	5.38273	4.65896	4.29742	4.16711	4.20879	3.50412		0.621497
10	5.3766	4.24523	4.41548	4.18672	3.70958	3.54318		0.646869
5	5.15397	4.48783	4.27728	3.97583	3.92608	3.63146		0.536054
2.5	5.92188	5.10317	4.45139	4.82589	4.83342	4.2384		0.588947
1.25	5.42337	5.62095	4.53442	4.9683	4.22456	4.56175		0.548068
0.625	5.71168	5.31442	4.55772	4.44018	4.54563	4.46541		0.538778
0.3125	5.41724	5.04326	4.80504	4.16553	5.00683	4.11088		0.519594
0	5.81188	5.5649	5.66369	5.24085	5.49939	4.17218		0.595951
Concentration	Compound 5
40	1.01295	0.855889	0.855401	0.986613	1.09994	0.809387		0.113403
20	1.41114	1.20497	1.29505	1.36318	1.92266	1.85275		0.30276
10	1.99355	2.41467	1.96965	2.75383	3.27933	3.20389		0.574331
5	2.99805	2.77676	2.88781	3.61086	4.11604	4.13734		0.61814
2.5	3.91686	3.25332	3.69102	4.0471	3.92158	4.33472		0.364419
1.25	3.71573	3.76532	3.58712	3.90434	4.70869	4.38854		0.439975
0.625	4.18612	4.16075	3.74061	4.30773	5.01274	4.85892		0.475268
0.3125	4.75291	3.95735	4.12514	4.10368	5.40085	5.05566		0.591646
0	4.81454	4.82413	4.64007	4.97453	5.73449	5.95512		0.547556
Concentration	Compound 6
40	0.709785	0.721442	0.676375	0.800521	0.725528	0.662193		0.0485142
20	0.791868	0.787782	0.776605	0.791748	0.668683	0.590926		0.0850006
10	1.32775	1.30528	0.982233	1.1756	1.17885	1.11431		0.127256
5	2.07263	2.02396	1.83407	2.00869	1.78444	1.78732		0.13063
2.5	2.98335	2.5632	2.44915	2.79888	2.2803	2.25206		0.290333
1.25	3.34041	3.1438	2.8377	3.1885	2.88348	2.85681		0.210731
0.625	3.73785	3.59087	2.83481	3.65048	2.98335	3.21146		0.378519
0.3125	4.08469	3.4666	3.3457	3.42526	3.18526	3.45987		0.307527
0	4.89698	3.7358	3.63029	3.77666	3.03984	3.47657		0.617961
Concentration	Compound 7
40	2.59308	2.14911	2.41321	2.10465	2.32175	2.11661		0.195973
20	3.43437	3.18948	2.91932	2.57573	2.96328	2.27627		0.416563
10	4.07136	3.559	3.89468	3.72238	3.24607	3.06838		0.382965
5	4.93673	4.36442	4.30648	4.15035	4.15018	4.36526		0.290297
2.5	4.19599	3.77257	4.38143	4.17022	3.94453	3.48894		0.325116
1.25	4.42421	5.0009	4.24905	5.01016	3.97013	4.02437		0.462532
0.625	5.1353	4.74085	4.84106	4.36711	4.53385	4.12929		0.358064
0.3125	5.58702	4.77841	4.58539	4.49461	4.436	4.16197		0.490583
0	5.07669	4.9118	4.7939	5.20638	4.89226	5.09707		0.154711
Concentration	Compound 8
40	5.20048	5.13637	4.24892	3.80368	4.36978	4.29448		0.548135
20	3.76515	3.36131	3.32262	3.15012	3.27258	3.79792		0.270448
10	3.84381	3.4299	3.74197	2.75316	3.10823	3.29352		0.40519
5	3.92518	3.96834	4.01327	3.56627	3.72086	3.02926		0.371209
2.5	4.38561	4.8566	4.54005	4.20608	3.20783	4.07162		0.562378
1.25	4.42702	4.17426	4.59504	4.0438	3.49113	4.35284		0.388916
0.625	4.63821	4.49145	5.41247	4.01599	3.55012	3.92022		0.658353
0.3125	4.66507	4.70456	4.87674	4.61535	4.51527	3.60959		0.451078
0	5.25851	5.32774	4.6972	4.66411	4.31175	4.48154		0.414005
Concentration	Compound 9
40	1.20477	1.18614	1.15434	1.16474	1.10499	0.894322		0.114784
20	1.79481	1.73144	1.65054	1.60712	1.69879	1.35303		0.154482
10	2.07188	1.91998	2.11505	1.75309	2.03173	1.68029		0.178025
5	2.54474	2.44581	2.27287	2.42295	2.3337	2.18435		0.129817
2.5	2.93536	3.17784	2.96946	2.61234	3.33784	2.99426		0.245381
1.25	3.22246	3.54512	3.43749	3.24979	3.56169	3.21351		0.162882
0.625	3.49989	3.7264	3.57414	3.67682	3.67887	3.16828		0.206161
0.3125	3.58696	3.51114	3.97831	3.67089	3.64852	2.73182		0.418356
0	3.86391	3.58454	4.10142	3.75724	3.86524	3.6103		0.19151
Concentration	Compound 10
40	0.842361	0.799704	0.761588	0.775736	0.826945	0.634885		0.0743584
20	0.863689	0.870763	0.870658	0.853131	0.920494	0.79432		0.0405838
10	1.2023	1.06113	1.1059	1.14339	1.1721	0.978566		0.0814479
5	1.7997	1.38993	1.48664	1.48517	1.52814	1.41326		0.147573
2.5	2.50238	1.92113	2.05332	1.99704	1.74681	1.6276		0.303449
1.25	3.42086	2.33333	2.10379	2.17031	2.18066	2.21571		0.503801
0.625	3.37251	2.25457	1.76053	1.90328	2.1436	2.0435		0.57857
0.3125	3.99947	2.35529	2.24696	1.85936	2.20262	2.14053		0.768774
0	4.2816	2.78809	2.70679	2.27336	2.34178	2.40175		0.754965
Concentration	Compound 11
40	0.344763	0.368997	0.339916	0.379329	0.35688	0.26275		0.04156
20	0.569503	0.479071	0.40318	0.405604	0.314151	0.254586		0.112629
10	0.578049	0.592717	0.553942	0.515805	0.417721	0.296932		0.114472
5	0.99781	0.870645	0.774984	0.86516	0.790927	0.534683		0.154448
2.5	1.63555	1.48109	1.31553	1.46757	1.37459	1.07192		0.190559
1.25	2.03133	2.12814	2.04065	2.31054	1.88351	1.5279		0.264924
0.625	2.84229	2.49956	2.46844	2.62609	2.09485	1.80417		0.376501
0.3125	2.88642	3.20605	3.15746	2.88463	2.91346	2.16666		0.372187
0	4.51024	4.48919	4.36266	4.36662	3.85974	3.55554		0.391071
Concentration	Compound 12
40	0.77609	0.842809	0.728415	0.743881	0.919882	0.988901		0.103989
20	1.45951	1.34346	1.21002	1.31636	1.22101	1.27981		0.0918614
10	2.2117	2.06408	1.80973	1.97422	1.95416	2.11725		0.140553
5	3.23281	2.61227	2.26168	2.2581	2.60895	2.61125		0.355564
2.5	3.79405	2.92529	2.63886	2.62454	2.83582	3.1675		0.438739
1.25	4.58893	3.49164	3.0356	3.16942	3.3265	3.24866		0.565832
0.625	4.43811	3.71071	2.87608	3.23639	3.08429	3.60846		0.559897
0.3125	4.82973	3.7534	3.15664	3.14258	3.55069	3.49714		0.622321
0	5.32591	4.47977	4.26607	4.03063	4.36755	4.37893		0.444062
Concentration	Compound 13
40	3.16651	3.13772	3.23514	2.83472	2.9634	2.45326		0.290608
20	3.98402	3.67419	3.3726	3.0287	3.11244	2.83595		0.431299
10	5.58395	4.77855	4.54033	4.01755	4.49118	3.24269		0.780756
5	5.65944	5.25042	4.60757	4.47064	5.05784	3.8406		0.643847
2.5	5.15351	4.50364	4.48328	5.02747	4.35022	3.7286		0.512434
1.25	5.38647	4.61845	4.82682	5.12613	5.364	4.2879		0.437044
0.625	5.89169	4.85895	5.11209	5.18968	5.03941	4.07461		0.585975
0.3125	5.40086	5.30501	5.06118	5.00325	4.48995	4.26139		0.452777
0	6.39656	5.39103	4.77714	5.60168	5.07294	4.53401		0.665326
Concentration	Compound 14
40	0.437897	0.433765	0.446943	0.3949	0.354807	0.3098		0.0545976
20	0.563537	0.538185	0.543769	0.499321	0.522438	0.413886		0.0533538
10	0.6741	0.710842	0.726589	0.738315	0.698334	0.581182		0.0570127
5	1.2564	1.37054	1.20849	1.25037	1.09915	0.996184		0.131547
2.5	2.19429	1.80296	2.00376	1.98243	1.84663	1.37121		0.279096
1.25	2.65809	2.34584	2.33467	2.42658	2.14101	1.74321		0.309537
0.625	3.47447	2.60259	2.59488	2.7375	2.14515	2.27023		0.467088
0.3125	3.41126	2.61699	2.59689	2.95404	2.22243	2.4354		0.420906
0	3.82972	3.00642	3.3179	3.09543	2.98241	2.96555		0.335014
Concentration	Compound 15
40	0.17452	0.206537	0.112773	0.124494	0.160084	0.160941		0.0340511
20	0.381057	0.422364	0.252561	0.26814	0.310448	0.369765		0.0675666
10	0.850874	0.953071	0.585307	0.607175	0.691934	0.728096		0.142565
5	1.80638	2.12468	1.19048	1.2648	1.42818	1.93287		0.383315
2.5	2.3488	2.71528	1.65015	1.83153	1.98232	2.447		0.406378
1.25	2.66039	2.19644	1.52266	1.91529	2.03664	2.44385		0.401974
0.625	2.69241	2.60036	1.44433	1.86369	2.11111	2.50231		0.487065
0.3125	2.59665	2.91353	1.32512	2.08109	2.55577	2.97627		0.618936
0	2.68941	2.84878	2.1993	3.1465	3.10934	3.51527		0.451473
