# Supplementary material for: Suppression of interferon signaling via small-molecule modulation of TFAM
Source: eLife. 2026 Feb 6;14:RP108742. doi: 10.7554/eLife.108742 (PMC12880803; doi:10.7554/eLife.108742)
Supplement: Figure 4—source data 3. [file elife-108742-fig4-data3.xlsx]

## Sheet: Figure 4A
VBIT-4
Unstim	TNF					Dunnett's multiple comparisons test	Mean Diff.	95.00% CI of diff.	Below threshold?	Summary	Adjusted P Value	B-?
DMSO	DMSO	1uM	3uM	10uM		DMSO vs. DMSO	11.98	4.182 to 19.78	Yes	**	0.0042	A	DMSO
1.146	10.3372	17.5153	19.4522	13.9079		DMSO vs. 1uM	-1.731	-9.529 to 6.067	No	ns	0.914	C	1uM
0.964455	12.7016	10.3575	14.1975	13.5458		DMSO vs. 3uM	-6.498	-14.30 to 1.300	No	ns	0.109	D	3uM
0.889549	15.9005	16.2585	24.7846	17.2389		DMSO vs. 10uM	-1.918	-9.716 to 5.880	No	ns	0.8834	E	10uM
H151
Unstim	TNF					Dunnett's multiple comparisons test	Mean Diff.	95.00% CI of diff.	Below threshold?	Summary	Adjusted P Value	B-?
DMSO	DMSO	0.5uM	1uM	5uM		DMSO vs. DMSO	11.98	8.298 to 15.66	Yes	****	<0.0001	A	DMSO
1.146	10.3372	7.01554	2.99626	0.959544		DMSO vs. 0.5uM	4.871	1.189 to 8.553	Yes	*	0.011	C	0.5uM
0.964455	12.7016	7.04941	3.71918	1.10474		DMSO vs. 1uM	9.124	5.442 to 12.81	Yes	***	0.0001	D	1uM
0.889549	15.9005	10.2602	4.85335	1.10197		DMSO vs. 5uM	11.92	8.242 to 15.61	Yes	****	<0.0001	E	5uM
Compound 1
Unstim	TNF					Dunnett's multiple comparisons test	Mean Diff.	95.00% CI of diff.	Below threshold?	Summary	Adjusted P Value	B-?
DMSO	DMSO	1uM	3uM	10uM		DMSO vs. DMSO	11.98	7.776 to 16.18	Yes	****	<0.0001	A	DMSO
1.146	10.3372	18.5713	14.811	15.1519		DMSO vs. 1uM	-4.619	-8.823 to -0.4150	Yes	*	0.0314	C	1uM
0.964455	12.7016	15.0773	16.3999	12.3251		DMSO vs. 3uM	-2.84	-7.044 to 1.364	No	ns	0.2206	D	3uM
0.889549	15.9005	19.1474	16.2485	14.8781		DMSO vs. 10uM	-1.139	-5.342 to 3.065	No	ns	0.8471	E	10uM
Compound 2
Unstim	TNF					Dunnett's multiple comparisons test	Mean Diff.	95.00% CI of diff.	Below threshold?	Summary	Adjusted P Value	B-?
DMSO	DMSO	1uM	3uM	10uM		DMSO vs. DMSO	11.98	6.082 to 17.88	Yes	***	0.0005	A	DMSO
1.146	10.3372	11.8189	13.0244	9.62214		DMSO vs. 1uM	-1.705	-7.602 to 4.193	No	ns	0.8182	C	1uM
0.964455	12.7016	15.4871	17.5391	13.4731		DMSO vs. 3uM	-3.427	-9.324 to 2.471	No	ns	0.3266	D	3uM
0.889549	15.9005	16.7471	18.6556	15.1216		DMSO vs. 10uM	0.2408	-5.657 to 6.139	No	ns	0.9998	E	10uM
Compound 3
Unstim	TNF					Dunnett's multiple comparisons test	Mean Diff.	95.00% CI of diff.	Below threshold?	Summary	Adjusted P Value	B-?
DMSO	DMSO	1uM	3uM	10uM		DMSO vs. DMSO	11.98	5.545 to 18.41	Yes	**	0.0011	A	DMSO
1.146	10.3372	18.1881	18.8454	14.272		DMSO vs. 1uM	-5.723	-12.16 to 0.7118	No	ns	0.0841	C	1uM
0.964455	12.7016	16.0576	23.4687	14.5281		DMSO vs. 3uM	-8.944	-15.38 to -2.509	Yes	**	0.0081	D	3uM
0.889549	15.9005	21.8629	23.4582	20.7892		DMSO vs. 10uM	-3.55	-9.985 to 2.885	No	ns	0.3664	E	10uM
Compound 15
Unstim	TNF					Dunnett's multiple comparisons test	Mean Diff.	95.00% CI of diff.	Below threshold?	Summary	Adjusted P Value	B-?
DMSO	DMSO	1uM	3uM	10uM		DMSO vs. DMSO	11.98	4.359 to 19.60	Yes	**	0.0036	A	DMSO
1.146	10.3372	16.8904	13.2127	7.25663		DMSO vs. 1uM	-5.988	-13.61 to 1.633	No	ns	0.1355	C	1uM
0.964455	12.7016	16.541	14.1769	4.20671		DMSO vs. 3uM	-2.281	-9.901 to 5.340	No	ns	0.8012	D	3uM
0.889549	15.9005	23.4704	18.3919	13.3138		DMSO vs. 10uM	4.721	-2.900 to 12.34	No	ns	0.2794	E	10uM

## Sheet: Figure 4C
	VBIT-4
	DMSO	1uM	3uM	10uM		Dunnett's multiple comparisons test	Mean Diff.	95.00% CI of diff.	Below threshold?	Summary	Adjusted P Value	A-?
	1.02303	1.0684	1.19378	0.931932		DMSO vs. 1uM	-0.03388	-0.2124 to 0.1446	No	ns	0.9033	B	1uM
	0.927672	0.933491	1.15321	0.799956		DMSO vs. 3uM	-0.2127	-0.3913 to -0.03421	Yes	*	0.0223	C	3uM
	1.0537	1.10417	1.29561	0.917972		DMSO vs. 10uM	0.1182	-0.06035 to 0.2967	No	ns	0.209	D	10uM
	H151
	DMSO	1uM	3uM	10uM		Dunnett's multiple comparisons test	Mean Diff.	95.00% CI of diff.	Below threshold?	Summary	Adjusted P Value	A-?
	0.857315	0.878706	1.1311	0.9291		DMSO vs. 1uM	0.01922	-0.2254 to 0.2639	No	ns	0.9914	B	1uM
	1.1091	1.04095	1.2833	1.06809		DMSO vs. 3uM	-0.1618	-0.4064 to 0.08286	No	ns	0.2095	C	3uM
	1.05169	1.04078	1.08903	1.07297		DMSO vs. 10uM	-0.01735	-0.2620 to 0.2273	No	ns	0.9936	D	10uM
	Compound 1
	DMSO	1uM	3uM	10uM		Dunnett's multiple comparisons test	Mean Diff.	95.00% CI of diff.	Below threshold?	Summary	Adjusted P Value	A-?
	0.898378	0.87139	0.883555	0.809273		DMSO vs. 1uM	-0.04016	-0.2906 to 0.2103	No	ns	0.9372	B	1uM
	1.06021	1.12645	1.00494	0.94641		DMSO vs. 3uM	0.01248	-0.2380 to 0.2629	No	ns	0.9977	C	3uM
	1.04991	1.13113	1.08256	0.909035		DMSO vs. 10uM	0.1146	-0.1359 to 0.3651	No	ns	0.4551	D	10uM
	Compound 2
	DMSO	1uM	3uM	10uM		Dunnett's multiple comparisons test	Mean Diff.	95.00% CI of diff.	Below threshold?	Summary	Adjusted P Value	A-?
	1.02303	0.958475	0.941377	0.866527		DMSO vs. 1uM	0.02887	-0.09590 to 0.1536	No	ns	0.8446	B	1uM
	0.927672	0.928299	0.97374	0.913866		DMSO vs. 3uM	0.01644	-0.1083 to 0.1412	No	ns	0.9628	C	3uM
	1.0537	1.03102	1.03996	0.946873		DMSO vs. 10uM	0.09238	-0.03239 to 0.2171	No	ns	0.1511	D	10uM
	Compound 3
	DMSO	1uM	3uM	10uM		Dunnett's multiple comparisons test	Mean Diff.	95.00% CI of diff.	Below threshold?	Summary	Adjusted P Value	A-?
	0.986922	0.918068	1.14422	1.30901		DMSO vs. 1uM	0.1302	-0.04863 to 0.3091	No	ns	0.159	B	1uM
	1.10419	0.758012	1.08761	1.21393		DMSO vs. 3uM	-0.09403	-0.2729 to 0.08483	No	ns	0.3563	C	3uM
	0.917645	0.941964	1.05903	1.24323		DMSO vs. 10uM	-0.2525	-0.4313 to -0.07361	Yes	**	0.0092	D	10uM
	Compound 11
	DMSO	1uM	3uM	10uM		Dunnett's multiple comparisons test	Mean Diff.	95.00% CI of diff.	Below threshold?	Summary	Adjusted P Value	A-?
	0.898378	0.964277	1.21995	0.984716		DMSO vs. 1uM	0.04964	-0.1551 to 0.2544	No	ns	0.8272	B	1uM
	1.06021	0.875844	1.17083	0.986422		DMSO vs. 3uM	-0.2544	-0.4591 to -0.04968	Yes	*	0.0181	C	3uM
	1.04991	1.01945	1.38094	1.10543		DMSO vs. 10uM	-0.02269	-0.2274 to 0.1820	No	ns	0.977	D	10uM
	Compound 15
	DMSO	1uM	3uM	10uM		Dunnett's multiple comparisons test	Mean Diff.	95.00% CI of diff.	Below threshold?	Summary	Adjusted P Value	A-?
	0.986922	0.961785	1.00906	0.846692		DMSO vs. 1uM	0.02409	-0.1719 to 0.2201	No	ns	0.9693	B	1uM
	1.10419	1.05207	1.12455	1.00509		DMSO vs. 3uM	-0.08822	-0.2843 to 0.1078	No	ns	0.4669	C	3uM
	0.917645	0.92263	1.13981	1.02267		DMSO vs. 10uM	0.04477	-0.1513 to 0.2408	No	ns	0.8493	D	10uM

## Sheet: Figure 4D
	VBIT-4									Šídák's multiple comparisons test	Mean Diff.	95.00% CI of diff.	Below threshold?	Summary	Adjusted P Value
	TFAM si S14000				TFAM si S14001					DMSO vs. 1uM	0.0704	-0.2395 to 0.3803	No	ns	0.9854	A-B
	DMSO	1uM	3uM	10uM	DMSO	1uM	3uM	10uM		DMSO vs. 3uM	0.09875	-0.2112 to 0.4087	No	ns	0.9271	A-C
	1.16213	0.977364	0.922941	0.82016	0.807527	1.13746	0.975471	0.807483		DMSO vs. 10uM	0.1981	-0.1118 to 0.5080	No	ns	0.3668	A-D
	1.02652	1.01714	1.02272	0.87475	1.1664	1.05518	0.93925	0.75822		DMSO vs. 1uM	-0.01595	-0.3259 to 0.2940	No	ns	>0.9999	E-F
	0.811355	0.794286	0.758079	0.710761	1.02608	0.855208	0.878761	0.722955		DMSO vs. 3uM	0.06884	-0.2411 to 0.3787	No	ns	0.987	E-G
										DMSO vs. 10uM	0.2371	-0.07280 to 0.5470	No	ns	0.1958	E-H
	H151									Šídák's multiple comparisons test	Mean Diff.	95.00% CI of diff.	Below threshold?	Summary	Adjusted P Value
	TFAM si S14000				TFAM si S14001					DMSO vs. 0.5uM	0.2756	-0.002860 to 0.5540	No	ns	0.0532	A-B
	DMSO	0.5uM	1uM	5uM	DMSO	0.5uM	1uM	5uM		DMSO vs. 1uM	0.3827	0.1042 to 0.6611	Yes	**	0.0048	A-C
	1.16213	0.797085	0.640228	0.737627	0.807527	0.841353	0.679261	0.875119		DMSO vs. 5uM	0.2454	-0.03308 to 0.5238	No	ns	0.1019	A-D
	1.02652	0.791008	0.650832	0.768528	1.1664	0.83072	0.798852	0.862646		DMSO vs. 0.5uM	0.1837	-0.09475 to 0.4622	No	ns	0.3336	E-F
	0.811355	0.585135	0.560901	0.75773	1.02608	0.776812	0.550741	0.738559		DMSO vs. 1uM	0.3237	0.04527 to 0.6022	Yes	*	0.0182	E-G
										DMSO vs. 5uM	0.1746	-0.1039 to 0.4530	No	ns	0.3877	E-H
	Compound 1									Šídák's multiple comparisons test	Mean Diff.	95.00% CI of diff.	Below threshold?	Summary	Adjusted P Value
	TFAM si S14000				TFAM si S14001					DMSO vs. 1uM	0.003073	-0.2824 to 0.2885	No	ns	>0.9999	A-B
	DMSO	1uM	3uM	10uM	DMSO	1uM	3uM	10uM		DMSO vs. 3uM	0.02115	-0.2643 to 0.3066	No	ns	>0.9999	A-C
	1.16213	1.11106	1.0281	1.01955	0.807527	1.06772	1.1613	1.0727		DMSO vs. 10uM	0.04657	-0.2389 to 0.3320	No	ns	0.9975	A-D
	1.02652	1.01611	1.04655	1.00817	1.1664	1.08765	1.06652	1.05944		DMSO vs. 1uM	-0.05657	-0.3420 to 0.2289	No	ns	0.9928	E-F
	0.811355	0.863619	0.86191	0.832562	1.02608	1.01435	1.02721	0.995916		DMSO vs. 3uM	-0.08501	-0.3705 to 0.2004	No	ns	0.946	E-G
										DMSO vs. 10uM	-0.04269	-0.3281 to 0.2428	No	ns	0.9985	E-H
	Compound 2									Šídák's multiple comparisons test	Mean Diff.	95.00% CI of diff.	Below threshold?	Summary	Adjusted P Value
	TFAM si S14000				TFAM si S14001					DMSO vs. 1uM	0.02116	-0.3815 to 0.4238	No	ns	>0.9999	A-B
	DMSO	1uM	3uM	10uM	DMSO	1uM	3uM	10uM		DMSO vs. 3uM	0.1	-0.3026 to 0.5027	No	ns	0.9771	A-C
	1.16213	1.161	1.01153	0.895969	0.807527	1.05462	1.15581	1.05437		DMSO vs. 10uM	0.1541	-0.2485 to 0.5567	No	ns	0.8462	A-D
	1.02652	0.96484	0.918844	0.910935	1.1664	1.15915	0.995482	0.941824		DMSO vs. 1uM	-0.02807	-0.4307 to 0.3745	No	ns	>0.9999	E-F
	0.811355	0.810679	0.769474	0.730763	1.02608	0.870454	0.735392	0.712897		DMSO vs. 3uM	0.03777	-0.3648 to 0.4404	No	ns	0.9999	E-G
										DMSO vs. 10uM	0.09697	-0.3056 to 0.4996	No	ns	0.9804	E-H
	Compound 3									Šídák's multiple comparisons test	Mean Diff.	95.00% CI of diff.	Below threshold?	Summary	Adjusted P Value
	TFAM si S14000				TFAM si S14001					DMSO vs. 1uM	0.02131	-0.3848 to 0.4274	No	ns	>0.9999	A-B
	DMSO	1uM	3uM	10uM	DMSO	1uM	3uM	10uM		DMSO vs. 3uM	0.0763	-0.3298 to 0.4824	No	ns	0.9946	A-C
	1.16213	1.03745	0.994653	0.878236	0.807527	1.05507	1.10769	0.954428		DMSO vs. 10uM	0.146	-0.2601 to 0.5521	No	ns	0.8793	A-D
	1.02652	1.12478	1.04607	0.980048	1.1664	1.04991	0.993921	1.11246		DMSO vs. 1uM	0.03096	-0.3752 to 0.4371	No	ns	>0.9999	E-F
	0.811355	0.77386	0.730362	0.703647	1.02608	0.802125	0.73858	0.846097		DMSO vs. 3uM	0.05327	-0.3528 to 0.4594	No	ns	0.9993	E-G
										DMSO vs. 10uM	0.02901	-0.3771 to 0.4351	No	ns	>0.9999	E-H
	Compound 15									Šídák's multiple comparisons test	Mean Diff.	95.00% CI of diff.	Below threshold?	Summary	Adjusted P Value
	TFAM si S14000				TFAM si S14001					DMSO vs. 1uM	0.0943	-0.1983 to 0.3869	No	ns	0.9234	A-B
	DMSO	1uM	3uM	10uM	DMSO	1uM	3uM	10uM		DMSO vs. 3uM	0.1685	-0.1241 to 0.4611	No	ns	0.4808	A-C
	1.16213	0.951743	0.868803	0.688869	0.807527	1.05189	0.920998	0.581216		DMSO vs. 10uM	0.323	0.03036 to 0.6156	Yes	*	0.0263	A-D
	1.02652	1.01508	0.912318	0.727878	1.1664	1.03979	0.937928	0.639018		DMSO vs. 1uM	-0.01321	-0.3058 to 0.2794	No	ns	>0.9999	E-F
	0.811355	0.750278	0.713317	0.61432	1.02608	0.947954	0.736894	0.574702		DMSO vs. 3uM	0.1347	-0.1579 to 0.4273	No	ns	0.71	E-G
										DMSO vs. 10uM	0.4017	0.1091 to 0.6943	Yes	**	0.0048	E-H

## Sheet: Figure 4E
	Comound 2
	DMSO	3uM	10uM		Šídák's multiple comparisons test	Mean Diff.	95.00% CI of diff.	Below threshold?	Summary	Adjusted P Value
	0.78418	0.40574	0.35193		DMSO vs. 3uM	0.3959	-0.1550 to 0.9468	No	ns	0.1492	A-B
	1.21861	0.45974	0.42709		DMSO vs. 10uM	0.6348	0.08394 to 1.186	Yes	*	0.0284	A-C
	1.04645	0.99612	0.36573
	Comound 15
	DMSO	3uM	10uM		Šídák's multiple comparisons test	Mean Diff.	95.00% CI of diff.	Below threshold?	Summary	Adjusted P Value
	0.97097	0.79405	0.95538		DMSO vs. 3uM	0.1162	-0.3639 to 0.5964	No	ns	0.7295	A-B
	1.16318	0.96477	0.46895		DMSO vs. 10uM	0.2944	-0.2425 to 0.8312	No	ns	0.2682	A-C
	0.88542	0.91201
